# Supplementary material for: Cell membrane fluidity and ROS resistance define DMSO tolerance of cryopreserved synovial MSCs and HUVECs
Source: PubMed Central journal article supplement (PMC9066911; doi:10.1186/s13287-022-02850-y), 2022-05-03

Figure S1

A

Top GO term : Freeze thaw / Fresh

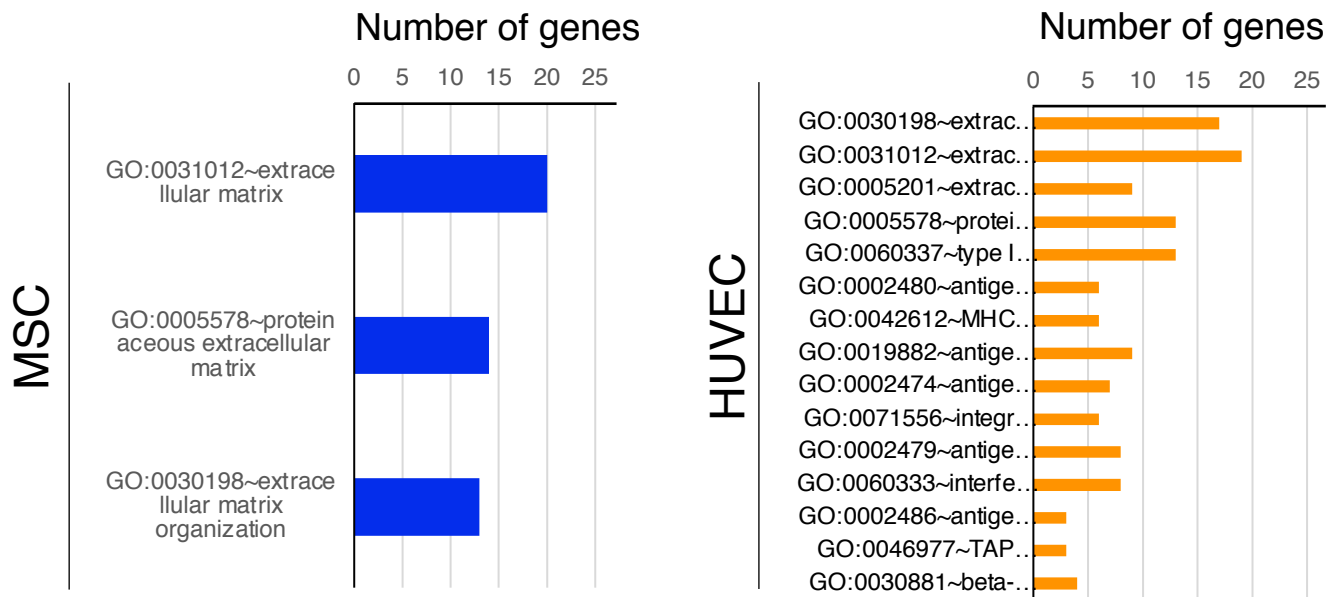

B

Freeze thaw / Fresh

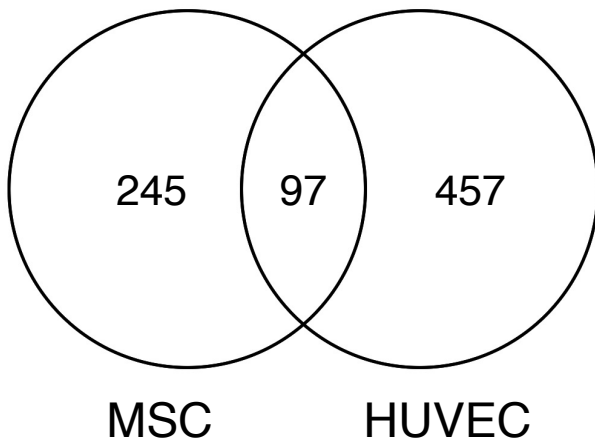

C

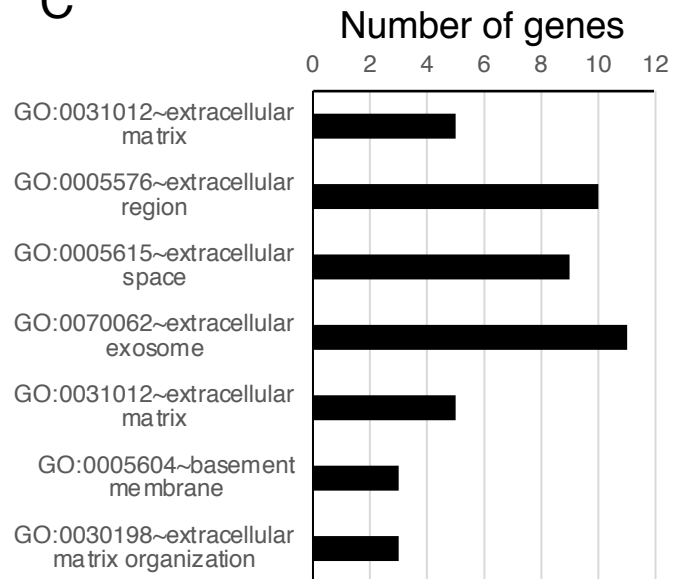

Figure S2

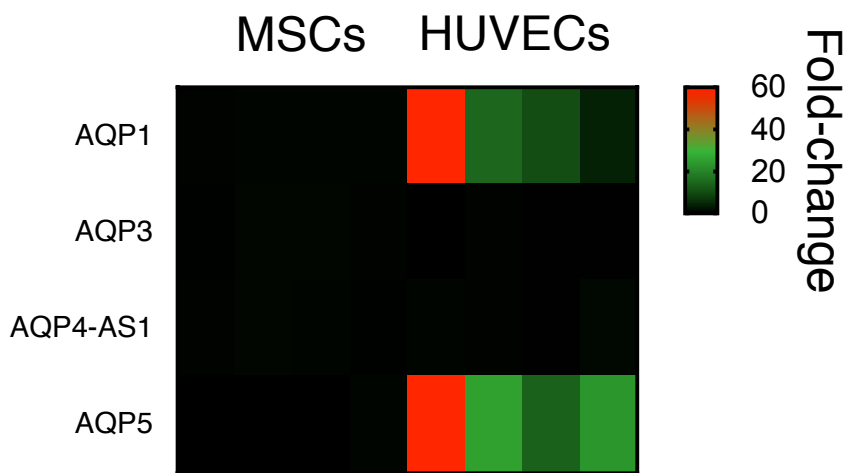

Figure S3

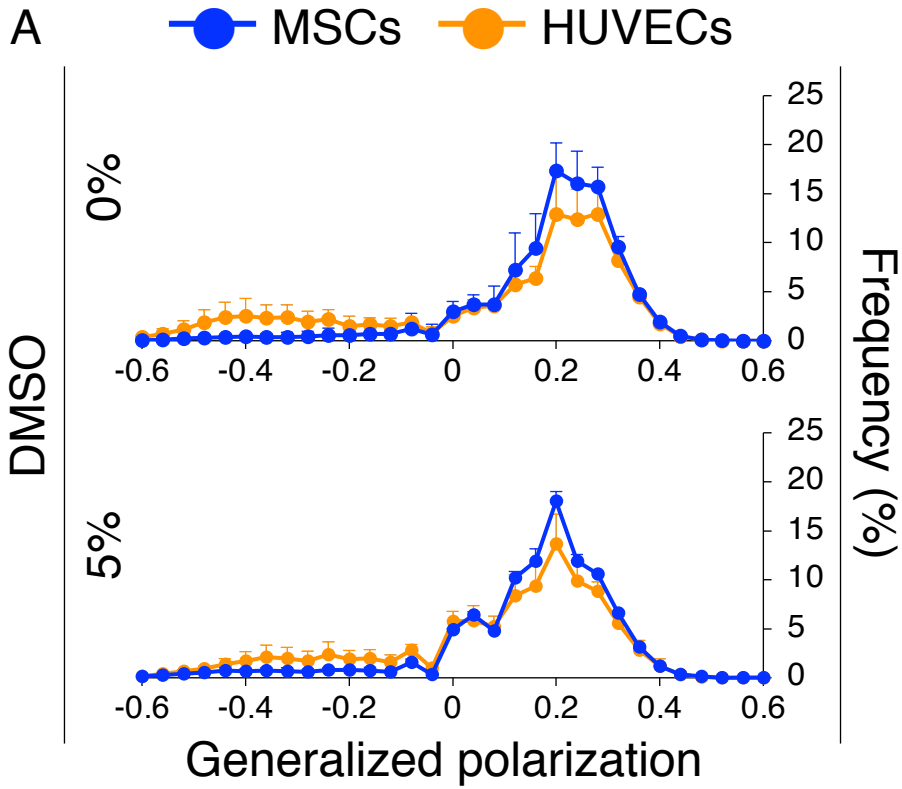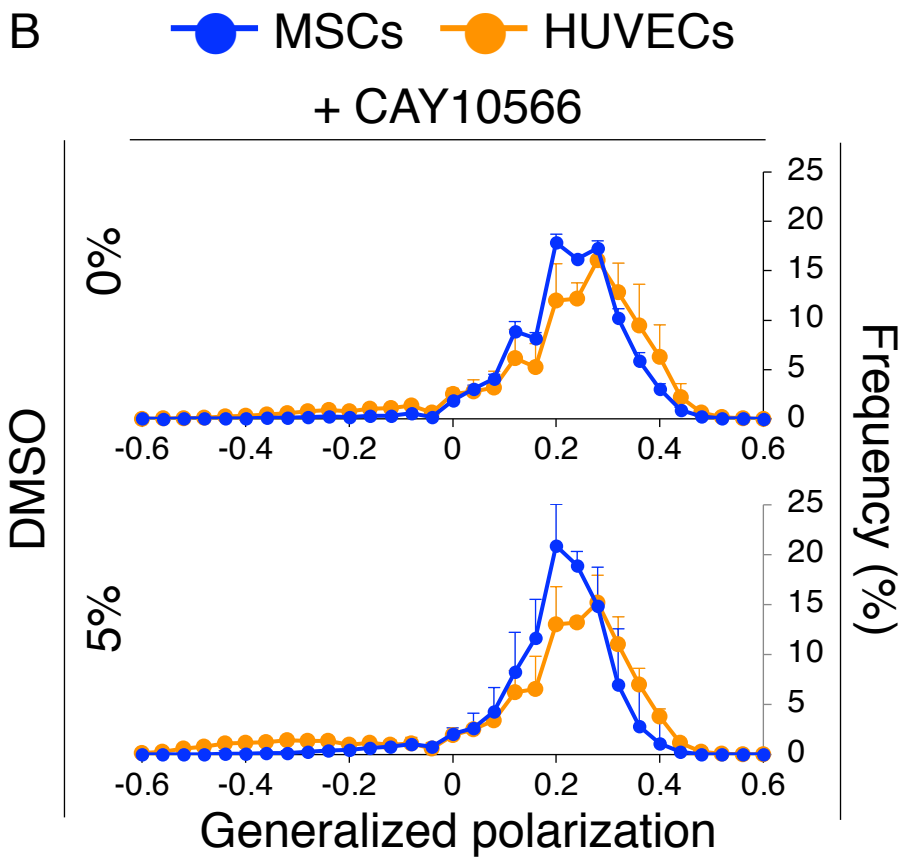

Figure S4

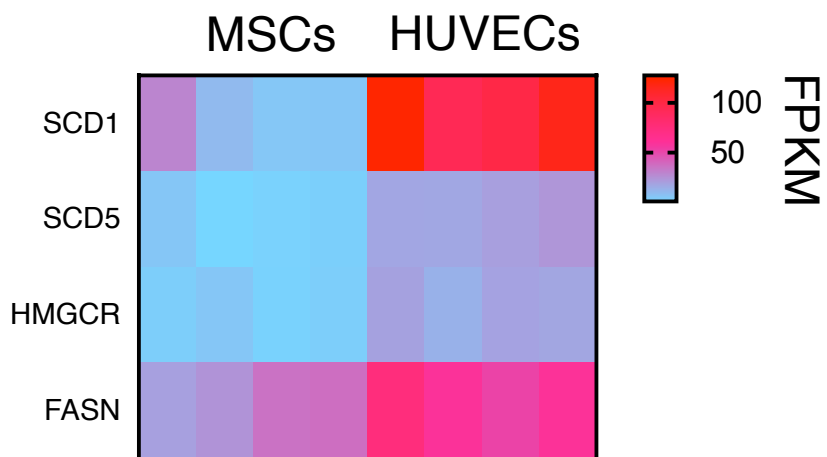

Supplement: 13287_2022_2850_MOESM1_ESM.pdf [file 13287_2022_2850_MOESM1_ESM.pdf]
